# Supplementary material
Source: publisher figshare collection journal article supplement (https://tandf.figshare.com/ndownloader/files/22150800)

## Supplemental Appendix to OPTIM-ARTS – An adaptive phase II open platform trial design with application to a metastatic melanoma study

In the main manuscript, we report design operating characteristics under two experimental scenarios for the true values of the ORR for the four treatment arms:

- Scenario A: true ORRs = 0.07, 0.10, 0.25, and 0.30.
- Scenario B: true ORRs = 0.10, 0.15, 0.25, and 0.35.

In this appendix, we report simulations under six additional scenarios:

- Scenario C: true ORRs = 0.10, 0.10, 0.10, and 0.10.
- Scenario D: true ORRs = 0.05, 0.07, 0.10, and 0.10.
- Scenario E: true ORRs = 0.25, 0.25, 0.25, and 0.25.
- Scenario F: true ORRs = 0.25, 0.28, 0.30, and 0.35.
- Scenario G: true ORRs = 0.07, 0.10, 0.25, and 0.25.
- Scenario H: true ORRs = 0.07, 0.15, 0.25, and 0.25.

In this appendix, for each of the scenarios C, D, E, F, G, and H, we have:

1. Two tables showing simulated operating characteristics for design  $\mathfrak{D}1$  (our main proposed OPTIM-ARTS design with Bayesian monitoring in Part 1 and shrinkage estimation for treatment selection for Part 2, as described in Sec. 2.2 of the main manuscript):
  - First table displays simulated decision probabilities (%) for the four treatment arms at different IAs during Part 1. See also Table 2 in the main manuscript for similar results under scenarios A and B.
  - Second table displays additional operating characteristics during Part 1: overall decision probabilities for the treatment arms and treatment sample sizes, and the operating characteristics for Part 2: treatment sample sizes for Part 2 and total (Part 1 and Part 2 combined), and power of the final analysis. See also Table 3 in the main manuscript for similar results under scenarios A and B.
2. A figure comparing operating characteristics for the four different designs:  $\mathfrak{D}1$ ,  $\mathfrak{D}2$ ,  $\mathfrak{D}3$ , and  $\mathfrak{D}4$  (see Table 4 in the main manuscript for a detailed description of these designs).
  - The figure shows for each treatment arm the power of the final test based on combined data from Parts 1 and 2, and the average sample size. See also Figures 4 and 5 for similar results under scenarios A and B, respectively.

Overall, the main findings for scenarios C, D, E, F, G, and H are consistent with those for scenarios A and B.

Specifically, for design  $\mathfrak{D}1$  (cf. all Tables below):

- In Part 1, the decision probabilities and the sample size per arm are reflective of the underlying treatment efficacy: very efficacious (or very poor) treatments are identified with high probability and small sample size.
- The type I error rate is well controlled at the nominal 2.5% level (cf. unconditional characteristics for treatments with true  $\text{ORR} \leq 0.10$ ).
- The average total (Parts 1 and 2 combined) sample size per arm ranges from 13 for  $\text{ORR} = 0.05$  to about 47–52 for  $\text{ORR} \geq 0.25$ , across the considered scenarios.

As regards the comparison of designs  $\mathfrak{D}1$ ,  $\mathfrak{D}2$ ,  $\mathfrak{D}3$ , and  $\mathfrak{D}4$  (cf. Figures S.1.3 – S.6.3):

- All designs maintain the type I error rate at the nominal 2.5% level, but with different average sample sizes per arm.
- No design stands out as “uniformly best” in terms of power/sample size tradeoff. Higher power naturally comes at the expense of a larger average sample size.
- Design  $\mathfrak{D}1$  has, on average, lower sample size for futile arms (with true  $\text{ORR} \leq 0.10$ ) than design  $\mathfrak{D}4$ , while both  $\mathfrak{D}1$  and  $\mathfrak{D}4$  maintain the type I error rate.
- Design  $\mathfrak{D}1$  is less powerful and generally has lower average total sample size per arm compared to design  $\mathfrak{D}4$  for treatment arms with  $\text{ORR} \geq 0.25$ . However,  $\mathfrak{D}1$  looks quite attractive from the cost-efficiency perspective for treatments with  $\text{ORR} \geq 0.30$ .

**Scenario C: True ORRs = 0.10, 0.10, 0.10, 0.10**

*Table S1.1: Probabilities (%) of decisions for the four treatment arms at different IAs during Part 1 for design D1.*

|            |                 | <i>Scenario C</i>      |                        |                        |                        |
|------------|-----------------|------------------------|------------------------|------------------------|------------------------|
|            | <b>Decision</b> | <b>TRT1<br/>(0.10)</b> | <b>TRT2<br/>(0.10)</b> | <b>TRT3<br/>(0.10)</b> | <b>TRT4<br/>(0.10)</b> |
| <b>IA1</b> | Expand          | 6.9                    | 7.4                    | 7.13                   | N/A                    |
|            | Terminate       | 73.42                  | 73.47                  | 73.58                  | N/A                    |
|            | Continue        | 19.68                  | 19.13                  | 19.29                  | N/A                    |
| <b>IA2</b> | Expand          | 9.76                   | 9.72                   | 9.54                   | N/A                    |
|            | Terminate       | 8.57                   | 8.27                   | 8.43                   | N/A                    |
|            | Continue        | 1.35                   | 1.14                   | 1.32                   | N/A                    |
| <b>IA3</b> | Expand          | 1.24                   | 1.08                   | 1.16                   | 7.12                   |
|            | Terminate       | 0.09                   | 0.05                   | 0.25                   | 73.73                  |
|            | Continue        | 0.02                   | 0.01                   | 0.01                   | 19.15                  |
| <b>IA4</b> | Expand          | 0.02                   | 0.01                   | 0.01                   | 11.07                  |
|            | Terminate       | 0                      | 0                      | 0                      | 8.08                   |
|            | Continue        | 0                      | 0                      | 0                      | 0                      |

Note: Probabilities are not cumulative. TRT4 is introduced into the study after IA2.

**Scenario C: True ORRs = 0.10, 0.10, 0.10, 0.10**

*Table S1.2: Operating characteristics for the four treatment arms for design D1. **Part 1:** Decision probabilities (%); Sample size for Part 1 ( $n_1$ ) – mean (SD) [IQR]. **Part 2** (Unconditional—derived across 10,000 simulation runs, and Conditional—derived across simulation runs for which a decision to expand a treatment into Part 2 is made): Sample size for Part 2 ( $n_2$ ) – mean (SD) [IQR]; Total sample size ( $n_{tot}$ ) – mean (SD) [IQR]; Power (%) of the final analysis using pooled data from Parts 1 and 2.*

|                                                  | <i>Scenario C</i>      |                        |                        |                        |
|--------------------------------------------------|------------------------|------------------------|------------------------|------------------------|
|                                                  | <b>TRT1<br/>(0.10)</b> | <b>TRT2<br/>(0.10)</b> | <b>TRT3<br/>(0.10)</b> | <b>TRT4<br/>(0.10)</b> |
| <b>Part 1</b>                                    |                        |                        |                        |                        |
| <i>Decision probabilities (%)</i>                |                        |                        |                        |                        |
| Pr(Expand)                                       | 17.92                  | 18.21                  | 17.84                  | 18.19                  |
| Pr(Terminate)                                    | 82.08                  | 81.79                  | 82.16                  | 81.81                  |
| <i>Sample size for Part 1 (<math>n_1</math>)</i> |                        |                        |                        |                        |
| Mean (SD) [IQR]                                  | 14 (7)<br>[10-10]      | 14 (7)<br>[10-10]      | 14 (7)<br>[10-10]      | 14 (7)<br>[10-10]      |
| <b>Part 2 – Unconditional Characteristics</b>    |                        |                        |                        |                        |
| <i>Sample size for Part 2 (<math>n_2</math>)</i> |                        |                        |                        |                        |
| Mean (SD) [IQR]                                  | 12 (26)<br>[0-0]       | 12 (26)<br>[0-0]       | 12 (26)<br>[0-0]       | 12 (26)<br>[0-0]       |
| <i>Total sample size (<math>n_{tot}</math>)</i>  |                        |                        |                        |                        |
| Mean (SD) [IQR]                                  | 26 (30)<br>[10-29]     | 26 (31)<br>[10-29]     | 25 (30)<br>[10-29]     | 26 (31)<br>[10-29]     |
| Power ( $P_{1-2}$ ) (%)                          | 0.8                    | 0.8                    | 0.8                    | 0.8                    |
| <b>Part 2 – Conditional Characteristics</b>      |                        |                        |                        |                        |
| <i>Sample size for Part 2 (<math>n_2</math>)</i> |                        |                        |                        |                        |
| Mean (SD) [IQR]                                  | 66 (12)<br>[70-70]     | 66 (12)<br>[70-70]     | 66 (12)<br>[70-70]     | 66 (12)<br>[70-70]     |
| <i>Total sample size (<math>n_{tot}</math>)</i>  |                        |                        |                        |                        |
| Mean (SD) [IQR]                                  | 88 (16)<br>[80-99]     | 88 (16)<br>[80-99]     | 87 (17)<br>[80-99]     | 88 (17)<br>[80-99]     |
| Power ( $P_{1-2}$ ) (%)                          | 4.2                    | 4.3                    | 4.4                    | 4.4                    |

Note: SD = standard deviation; IQR = Interquartile Range [Q25 – Q75]

**Scenario C: True ORRs = 0.10, 0.10, 0.10, 0.10**

*Figure S.1.3: Power of the final analysis (left plot) and average total sample size (right plot) for the four treatment arms for designs D1, D2, D3, and D4*

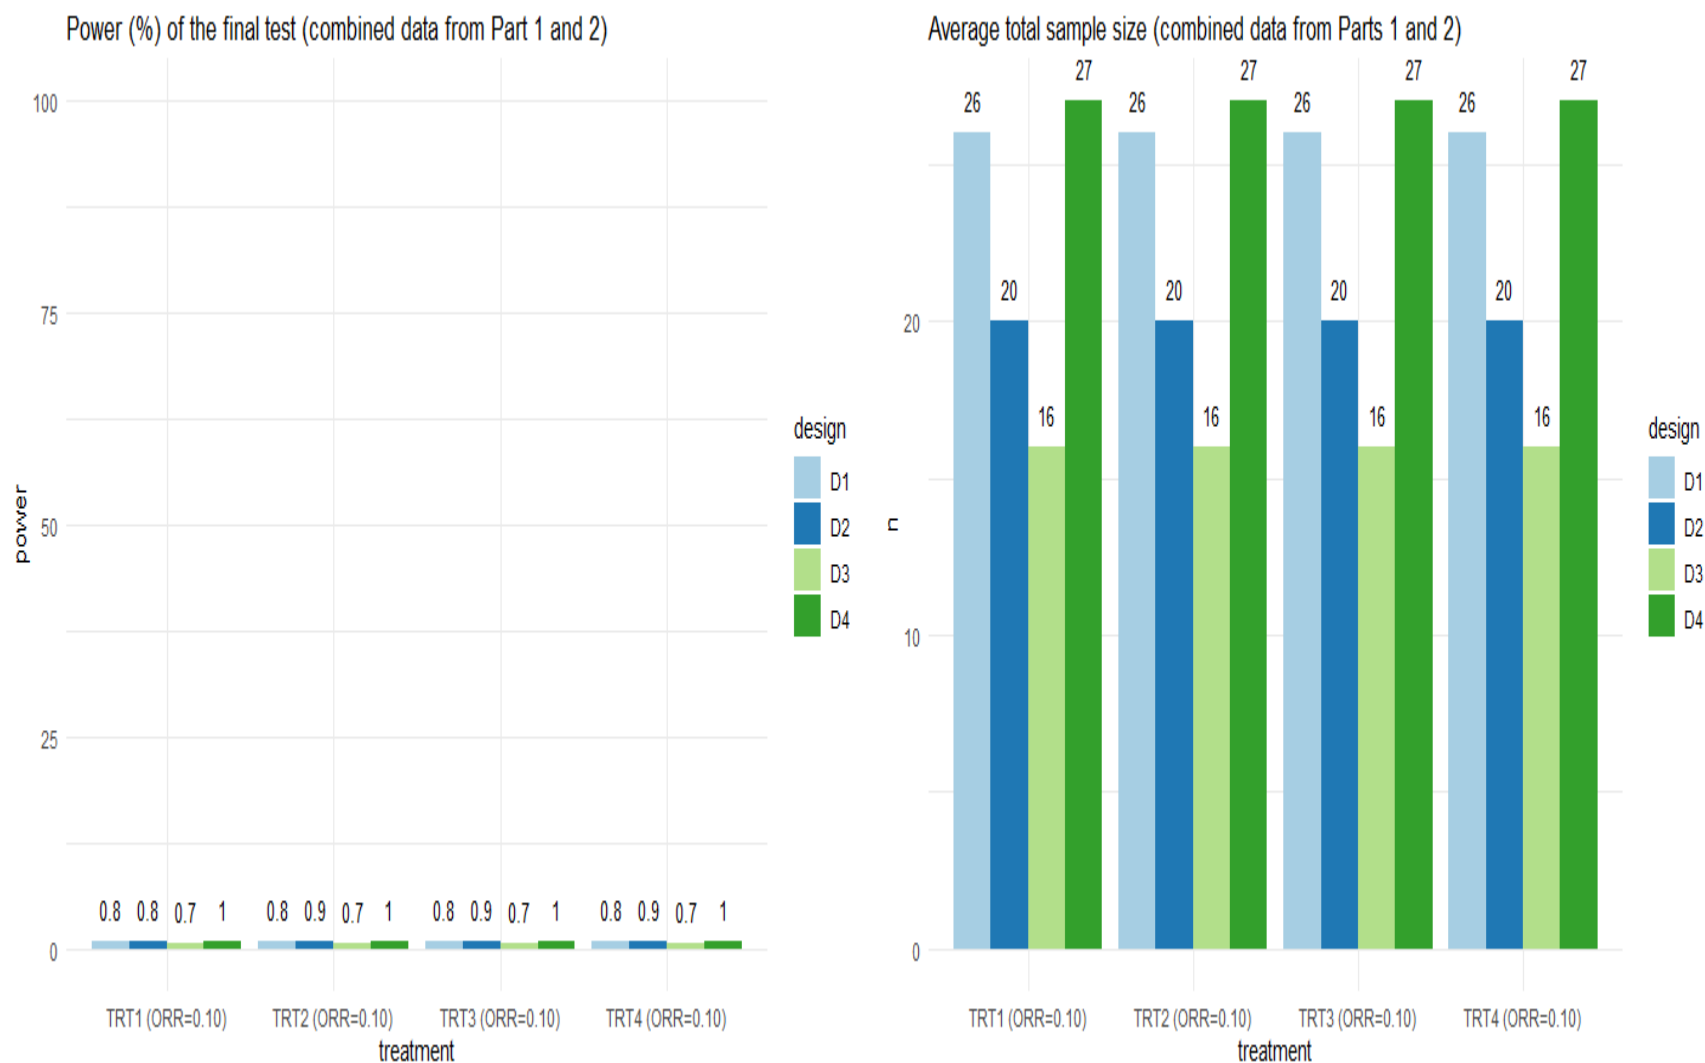

**Scenario D: True ORRs = 0.05, 0.07, 0.10, 0.10**

*Table S2.1: Probabilities (%) of decisions for the four treatment arms at different IAs during Part 1 for design D1.*

|            |                 | <i>Scenario D</i>      |                        |                        |                        |
|------------|-----------------|------------------------|------------------------|------------------------|------------------------|
|            | <b>Decision</b> | <b>TRT1<br/>(0.05)</b> | <b>TRT2<br/>(0.07)</b> | <b>TRT3<br/>(0.10)</b> | <b>TRT4<br/>(0.10)</b> |
| <b>IA1</b> | Expand          | 1.11                   | 2.87                   | 7.13                   | N/A                    |
|            | Terminate       | 91.4                   | 84.32                  | 73.58                  | N/A                    |
|            | Continue        | 7.49                   | 12.81                  | 19.29                  | N/A                    |
| <b>IA2</b> | Expand          | 1.51                   | 4.78                   | 10.67                  | N/A                    |
|            | Terminate       | 5.79                   | 7.64                   | 7.96                   | N/A                    |
|            | Continue        | 0.19                   | 0.39                   | 0.66                   | N/A                    |
| <b>IA3</b> | Expand          | 0.17                   | 0.37                   | 0.65                   | 7.07                   |
|            | Terminate       | 0.02                   | 0.01                   | 0.01                   | 73.28                  |
|            | Continue        | 0                      | 0.01                   | 0                      | 19.65                  |
| <b>IA4</b> | Expand          | N/A                    | 0.01                   | N/A                    | 11.45                  |
|            | Terminate       | N/A                    | 0                      | N/A                    | 8.2                    |
|            | Continue        | N/A                    | 0                      | N/A                    | 0                      |

Note: Probabilities are not cumulative. TRT4 is introduced into the study after IA2.

**Scenario D: True ORRs = 0.05, 0.07, 0.10, 0.10**

*Table S2.2: Operating characteristics for the four treatment arms for design D1. **Part 1:** Decision probabilities (%); Sample size for Part 1 ( $n_1$ ) – mean (SD) [IQR]. **Part 2** (Unconditional—derived across 10,000 simulation runs, and Conditional—derived across simulation runs for which a decision to expand a treatment into Part 2 is made): Sample size for Part 2 ( $n_2$ ) – mean (SD) [IQR]; Total sample size ( $n_{tot}$ ) – mean (SD) [IQR]; Power (%) of the final analysis using pooled data from Parts 1 and 2.*

|                                                  | <b>Scenario D</b>      |                        |                        |                        |
|--------------------------------------------------|------------------------|------------------------|------------------------|------------------------|
|                                                  | <b>TRT1<br/>(0.05)</b> | <b>TRT2<br/>(0.07)</b> | <b>TRT3<br/>(0.10)</b> | <b>TRT4<br/>(0.10)</b> |
| <b>Part 1</b>                                    |                        |                        |                        |                        |
| <b>Decision probabilities (%)</b>                |                        |                        |                        |                        |
| Pr(Expand)                                       | 2.79                   | 8.03                   | 18.45                  | 18.52                  |
| Pr(Terminate)                                    | 97.21                  | 91.97                  | 81.55                  | 81.48                  |
| <b>Sample size for Part 1 (<math>n_1</math>)</b> |                        |                        |                        |                        |
| Mean (SD) [IQR]                                  | 11 (5)<br>[10-10]      | 12 (6)<br>[10-10]      | 14 (7)<br>[10-10]      | 14 (7)<br>[10-10]      |
| <b>Part 2 – Unconditional Characteristics</b>    |                        |                        |                        |                        |
| <b>Sample size for Part 2 (<math>n_2</math>)</b> |                        |                        |                        |                        |
| Mean (SD) [IQR]                                  | 2 (11)<br>[0-0]        | 5 (19)<br>[0-0]        | 12 (26)<br>[0-0]       | 12 (26)<br>[0-0]       |
| <b>Total sample size (<math>n_{tot}</math>)</b>  |                        |                        |                        |                        |
| Mean (SD) [IQR]                                  | 13 (14)<br>[10-10]     | 18 (22)<br>[10-10]     | 26 (31)<br>[10-29]     | 26 (31)<br>[10-29]     |
| Power ( $P_{1-2}$ ) (%)                          | <0.1                   | <0.1                   | 0.8                    | 0.8                    |
| <b>Part 2 – Conditional Characteristics</b>      |                        |                        |                        |                        |
| <b>Sample size for Part 2 (<math>n_2</math>)</b> |                        |                        |                        |                        |
| Mean (SD) [IQR]                                  | 69 (6)<br>[70-70]      | 68 (8)<br>[70-70]      | 66 (11)<br>[70-70]     | 66 (11)<br>[70-70]     |
| <b>Total sample size (<math>n_{tot}</math>)</b>  |                        |                        |                        |                        |
| Mean (SD) [IQR]                                  | 90 (12)<br>[80-99]     | 91 (14)<br>[80-99]     | 88 (16)<br>[80-99]     | 88 (16)<br>[80-99]     |
| Power ( $P_{1-2}$ ) (%)                          | <0.1                   | 0.4                    | 4.3                    | 4.4                    |

Note: SD = standard deviation; IQR = Interquartile Range [Q25 – Q75]

**Scenario D: True ORRs = 0.05, 0.07, 0.10, 0.10**

*Figure S.2.3: Power of the final analysis (left plot) and average total sample size (right plot) for the four treatment arms for designs D1, D2, D3, and D4*

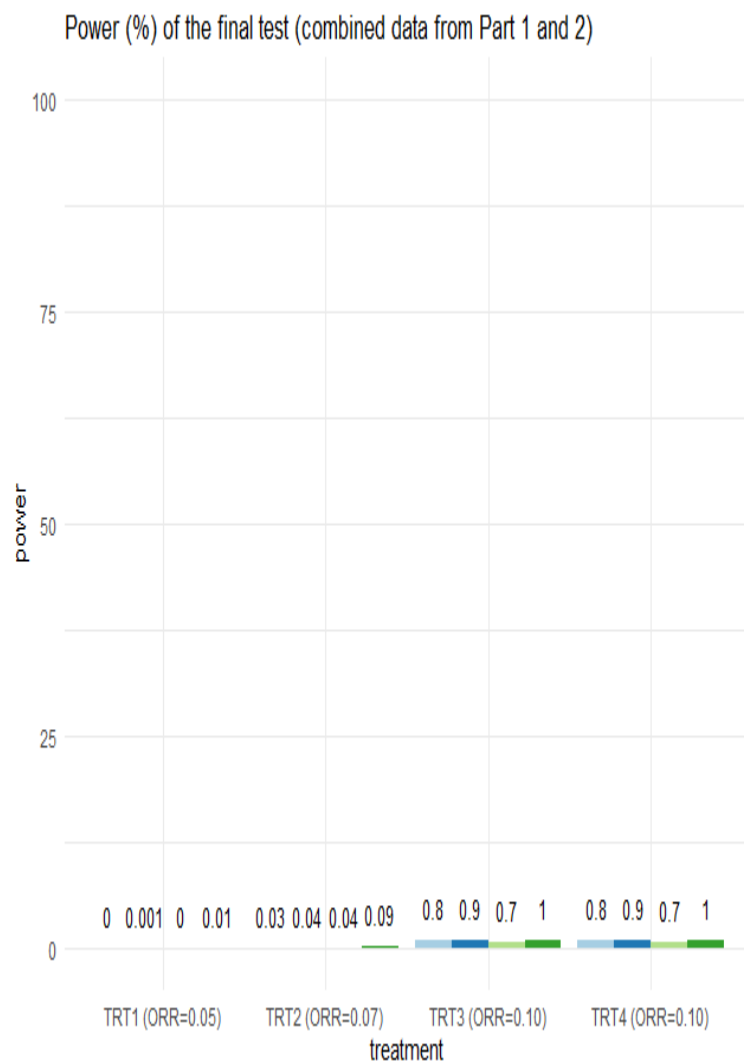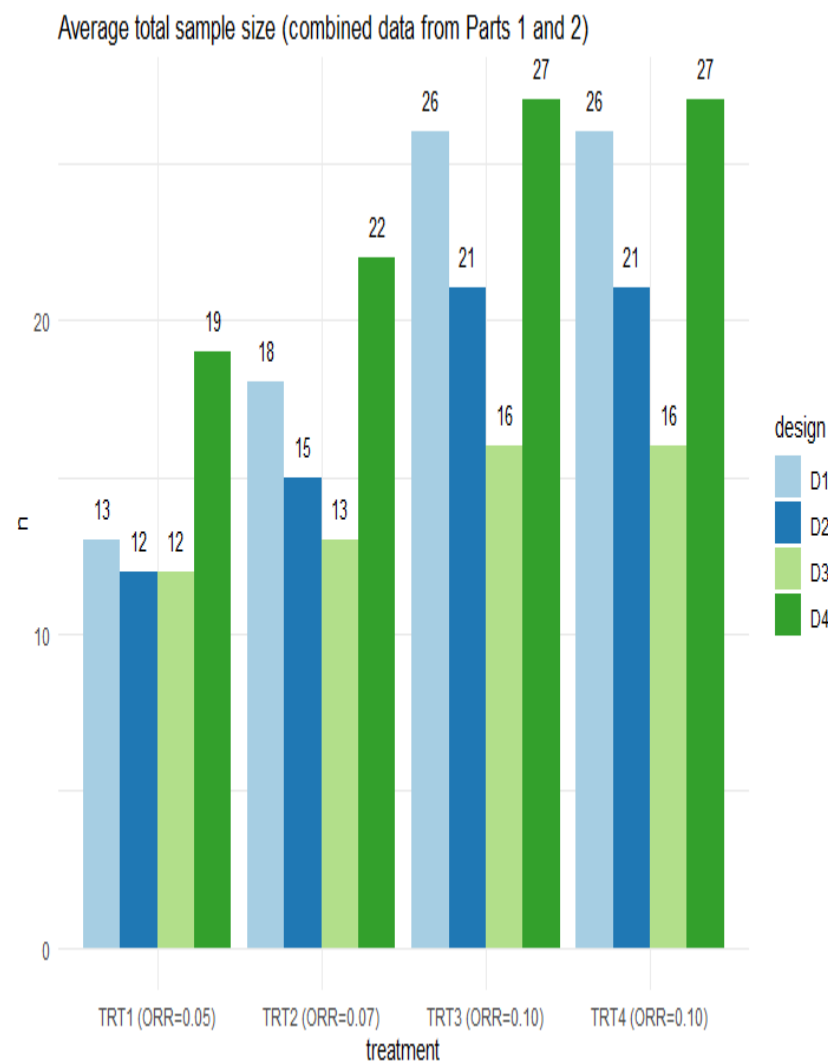



**Scenario E: True ORRs = 0.25, 0.25, 0.25, 0.25**

*Table S3.1: Probabilities (%) of decisions for the four treatment arms at different IAs during Part 1 for design D1.*

|            |                 | <i>Scenario E</i>      |                        |                        |                        |
|------------|-----------------|------------------------|------------------------|------------------------|------------------------|
|            | <b>Decision</b> | <b>TRT1<br/>(0.25)</b> | <b>TRT2<br/>(0.25)</b> | <b>TRT3<br/>(0.25)</b> | <b>TRT4<br/>(0.25)</b> |
| <b>IA1</b> | Expand          | 47.63                  | 46.7                   | 47.91                  | N/A                    |
|            | Terminate       | 24.08                  | 24.65                  | 24.02                  | N/A                    |
|            | Continue        | 28.29                  | 28.65                  | 28.07                  | N/A                    |
| <b>IA2</b> | Expand          | 24.23                  | 25.06                  | 24.21                  | N/A                    |
|            | Terminate       | 1.08                   | 0.92                   | 1.32                   | N/A                    |
|            | Continue        | 2.98                   | 2.67                   | 2.54                   | N/A                    |
| <b>IA3</b> | Expand          | 2.93                   | 2.59                   | 2.53                   | 47.23                  |
|            | Terminate       | 0.03                   | 0.05                   | 0                      | 24.54                  |
|            | Continue        | 0.02                   | 0.03                   | 0.01                   | 28.23                  |
| <b>IA4</b> | Expand          | 0.02                   | 0.03                   | 0.01                   | 27.36                  |
|            | Terminate       | 0                      | 0                      | 0                      | 0.87                   |
|            | Continue        | 0                      | 0                      | 0                      | 0                      |

Note: Probabilities are not cumulative. TRT4 is introduced into the study after IA2.

**Scenario E: True ORRs = 0.25, 0.25, 0.25, 0.25**

*Table S3.2: Operating characteristics for the four treatment arms for design D1. **Part 1:** Decision probabilities (%); Sample size for Part 1 ( $n_1$ ) – mean (SD) [IQR]. **Part 2** (Unconditional—derived across 10,000 simulation runs, and Conditional—derived across simulation runs for which a decision to expand a treatment into Part 2 is made): Sample size for Part 2 ( $n_2$ ) – mean (SD) [IQR]; Total sample size ( $n_{tot}$ ) – mean (SD) [IQR]; Power (%) of the final analysis using pooled data from Parts 1 and 2.*

|                                                  | <b>Scenario E</b>      |                        |                        |                        |
|--------------------------------------------------|------------------------|------------------------|------------------------|------------------------|
|                                                  | <b>TRT1<br/>(0.25)</b> | <b>TRT2<br/>(0.25)</b> | <b>TRT3<br/>(0.25)</b> | <b>TRT4<br/>(0.25)</b> |
| <b>Part 1</b>                                    |                        |                        |                        |                        |
| <b>Decision probabilities (%)</b>                |                        |                        |                        |                        |
| Pr(Expand)                                       | 74.81                  | 74.38                  | 74.66                  | 74.59                  |
| Pr(Terminate)                                    | 25.19                  | 25.62                  | 25.34                  | 25.41                  |
| <b>Sample size for Part 1 (<math>n_1</math>)</b> |                        |                        |                        |                        |
| Mean (SD) [IQR]                                  | 15 (8)<br>[10-29]      | 15 (8)<br>[10-29]      | 15 (8)<br>[10-28]      | 15 (9)<br>[10-29]      |
| <b>Part 2 – Unconditional Characteristics</b>    |                        |                        |                        |                        |
| <b>Sample size for Part 2 (<math>n_2</math>)</b> |                        |                        |                        |                        |
| Mean (SD) [IQR]                                  | 34 (28)<br>[0-70]      | 34 (28)<br>[0-70]      | 34 (28)<br>[0-70]      | 33 (28)<br>[0-70]      |
| <b>Total sample size (<math>n_{tot}</math>)</b>  |                        |                        |                        |                        |
| Mean (SD) [IQR]                                  | 50 (31)<br>[29-80]     | 49 (31)<br>[27-80]     | 49 (31)<br>[29-80]     | 49 (31)<br>[29-80]     |
| Power ( $P_{1-2}$ ) (%)                          | 68.0                   | 67.7                   | 68.0                   | 67.5                   |
| <b>Part 2 – Conditional Characteristics</b>      |                        |                        |                        |                        |
| <b>Sample size for Part 2 (<math>n_2</math>)</b> |                        |                        |                        |                        |
| Mean (SD) [IQR]                                  | 46 (23)<br>[20-70]     | 46 (23)<br>[20-70]     | 46 (23)<br>[20-70]     | 45 (23)<br>[20-70]     |
| <b>Total sample size (<math>n_{tot}</math>)</b>  |                        |                        |                        |                        |
| Mean (SD) [IQR]                                  | 63 (25)<br>[30-80]     | 62 (25)<br>[30-80]     | 63 (25)<br>[30-80]     | 62 (25)<br>[30-80]     |
| Power ( $P_{1-2}$ ) (%)                          | 91.0                   | 91.0                   | 91.0                   | 90.5                   |

Note: SD = standard deviation; IQR = Interquartile Range [Q25 – Q75]

**Scenario E: True ORRs = 0.25, 0.25, 0.25, 0.25**

*Figure S.3.3: Power of the final analysis (left plot) and average total sample size (right plot) for the four treatment arms for designs D1, D2, D3, and D4*

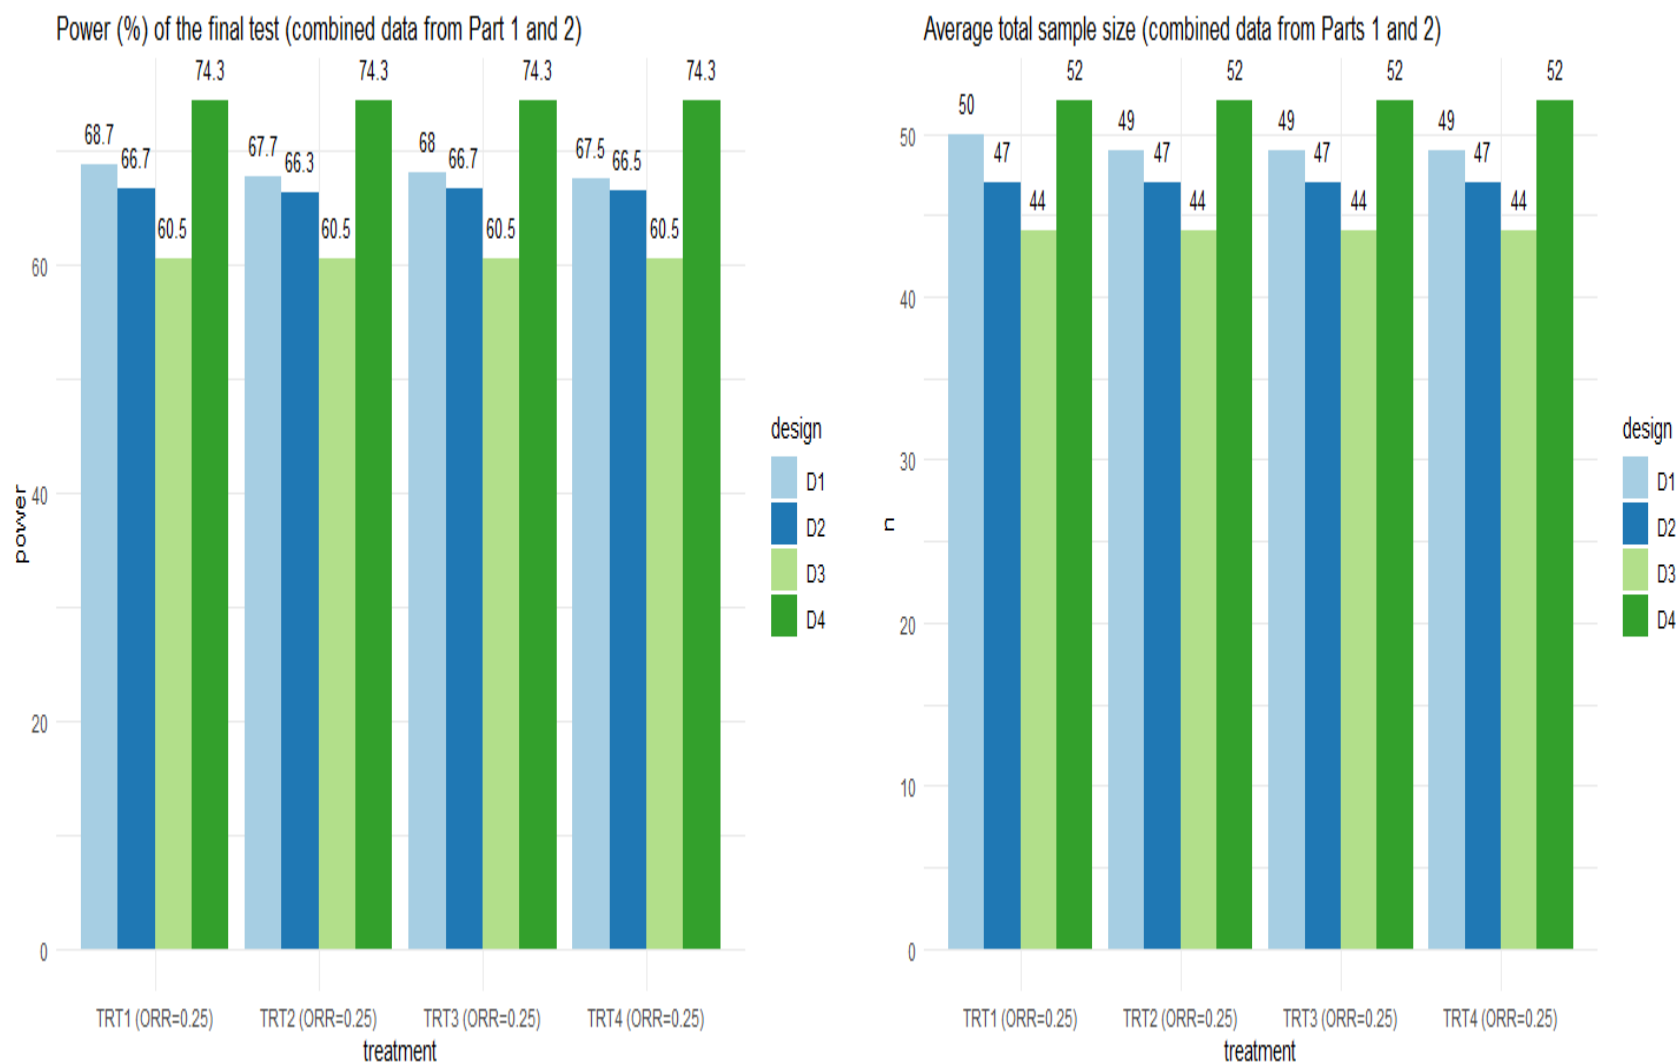

**Scenario F: True ORRs = 0.25, 0.28, 0.30, 0.35**

*Table S4.1: Probabilities (%) of decisions for the four treatment arms at different IAs during Part 1 for design D1.*

|            |                 | <i>Scenario F</i>      |                        |                        |                        |
|------------|-----------------|------------------------|------------------------|------------------------|------------------------|
|            | <b>Decision</b> | <b>TRT1<br/>(0.25)</b> | <b>TRT2<br/>(0.28)</b> | <b>TRT3<br/>(0.30)</b> | <b>TRT4<br/>(0.35)</b> |
| <b>IA1</b> | Expand          | 47.63                  | 55.21                  | 62.54                  | N/A                    |
|            | Terminate       | 24.08                  | 18.24                  | 15.1                   | N/A                    |
|            | Continue        | 28.29                  | 26.55                  | 22.36                  | N/A                    |
| <b>IA2</b> | Expand          | 25.04                  | 24.14                  | 20.64                  | N/A                    |
|            | Terminate       | 1.01                   | 0.5                    | 0.26                   | N/A                    |
|            | Continue        | 2.24                   | 1.91                   | 1.46                   | N/A                    |
| <b>IA3</b> | Expand          | 2.19                   | 1.85                   | 1.44                   | 73.26                  |
|            | Terminate       | 0.02                   | 0.03                   | 0.01                   | 8.79                   |
|            | Continue        | 0.02                   | 0.03                   | 0.01                   | 17.95                  |
| <b>IA4</b> | Expand          | 0.02                   | 0.03                   | 0.01                   | 17.89                  |
|            | Terminate       | 0                      | 0                      | 0                      | 0.06                   |
|            | Continue        | 0                      | 0                      | 0                      | 0                      |

Note: Probabilities are not cumulative. TRT4 is introduced into the study after IA2.

**Scenario F: True ORRs = 0.25, 0.28, 0.30, 0.35**

*Table S4.2: Operating characteristics for the four treatment arms for design D1. **Part 1:** Decision probabilities (%); Sample size for Part 1 ( $n_1$ ) – mean (SD) [IQR]. **Part 2** (Unconditional—derived across 10,000 simulation runs, and Conditional—derived across simulation runs for which a decision to expand a treatment into Part 2 is made): Sample size for Part 2 ( $n_2$ ) – mean (SD) [IQR]; Total sample size ( $n_{tot}$ ) – mean (SD) [IQR]; Power (%) of the final analysis using pooled data from Parts 1 and 2.*

|                                                  | <b>Scenario F</b>      |                        |                        |                        |
|--------------------------------------------------|------------------------|------------------------|------------------------|------------------------|
|                                                  | <b>TRT1<br/>(0.25)</b> | <b>TRT2<br/>(0.28)</b> | <b>TRT3<br/>(0.30)</b> | <b>TRT4<br/>(0.35)</b> |
| <b>Part 1</b>                                    |                        |                        |                        |                        |
| <b>Decision probabilities (%)</b>                |                        |                        |                        |                        |
| Pr(Expand)                                       | 74.88                  | 81.23                  | 84.63                  | 91.15                  |
| Pr(Terminate)                                    | 25.12                  | 18.77                  | 15.37                  | 8.85                   |
| <b>Sample size for Part 1 (<math>n_1</math>)</b> |                        |                        |                        |                        |
| Mean (SD) [IQR]                                  | 15 (8)<br>[10-29]      | 15 (8)<br>[10-26]      | 14 (8)<br>[10-10]      | 13 (7)<br>[10-10]      |
| <b>Part 2 – Unconditional Characteristics</b>    |                        |                        |                        |                        |
| <b>Sample size for Part 2 (<math>n_2</math>)</b> |                        |                        |                        |                        |
| Mean (SD) [IQR]                                  | 34 (28)<br>[0-70]      | 34 (26)<br>[20-70]     | 34 (26)<br>[20-70]     | 31 (22)<br>[20-55]     |
| <b>Total sample size (<math>n_{tot}</math>)</b>  |                        |                        |                        |                        |
| Mean (SD) [IQR]                                  | 49 (31)<br>[29-80]     | 49 (29)<br>[30-80]     | 48 (27)<br>[30-80]     | 44 (23)<br>[30-65]     |
| Power ( $P_{1-2}$ ) (%)                          | 67.8                   | 77.2                   | 81.7                   | 89.8                   |
| <b>Part 2 – Conditional Characteristics</b>      |                        |                        |                        |                        |
| <b>Sample size for Part 2 (<math>n_2</math>)</b> |                        |                        |                        |                        |
| Mean (SD) [IQR]                                  | 45 (23)<br>[20-70]     | 41 (23)<br>[20-70]     | 40 (23)<br>[20-70]     | 34 (20)<br>[20-55]     |
| <b>Total sample size (<math>n_{tot}</math>)</b>  |                        |                        |                        |                        |
| Mean (SD) [IQR]                                  | 62 (25)<br>[30-80]     | 57 (24)<br>[30-80]     | 55 (24)<br>[30-80]     | 47 (21)<br>[30-65]     |
| Power ( $P_{1-2}$ ) (%)                          | 90.6                   | 95.0                   | 96.6                   | 98.6                   |

Note: SD = standard deviation; IQR = Interquartile Range [Q25 – Q75]

**Scenario F: True ORRs = 0.25, 0.28, 0.30, 0.35**

*Figure S.4.3: Power of the final analysis (left plot) and average total sample size (right plot) for the four treatment arms for designs D1, D2, D3, and D4*

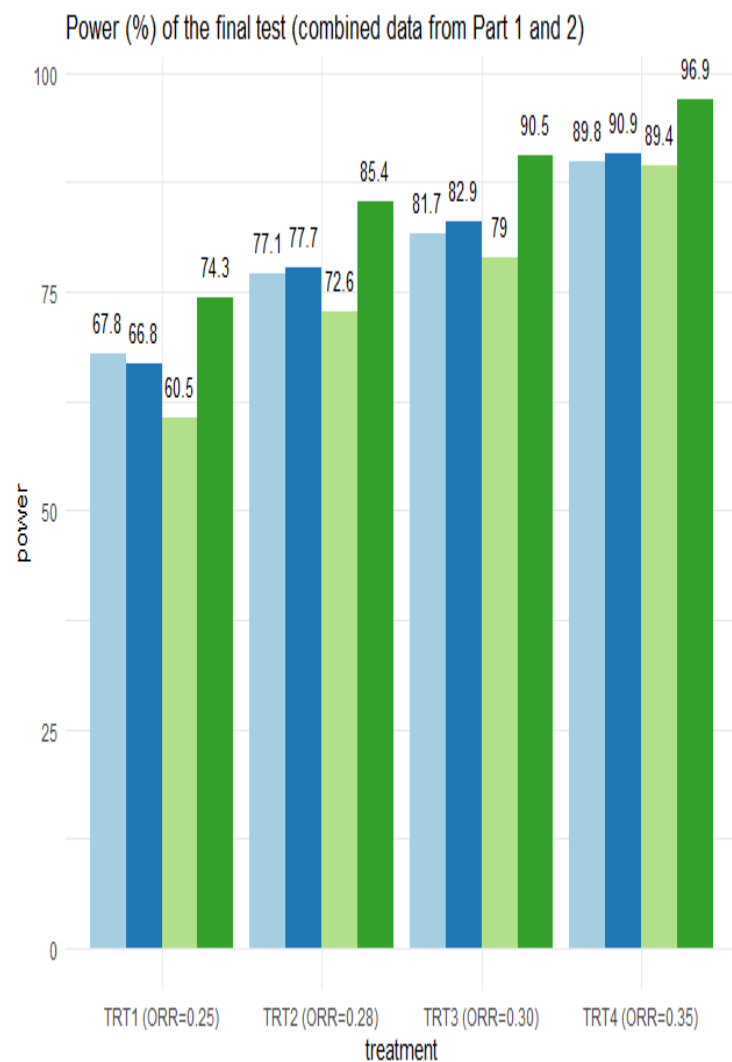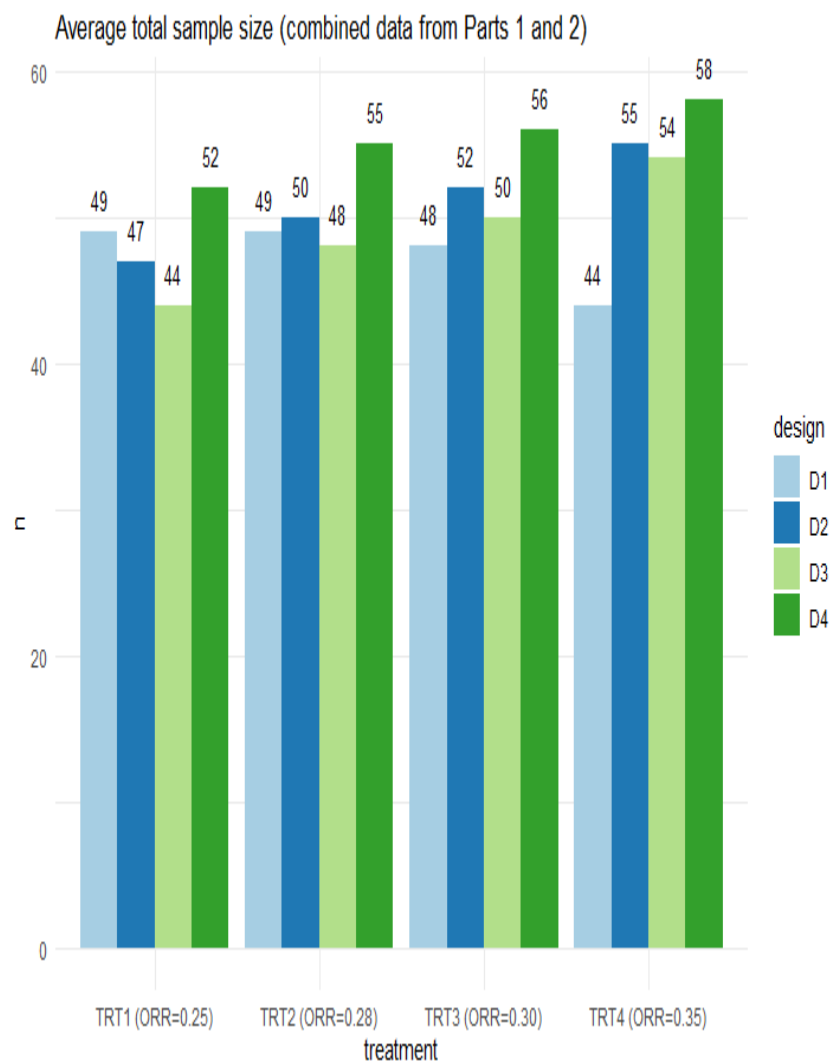

**Scenario G: True ORRs = 0.07, 0.10, 0.25, 0.25**

*Table S5.1: Probabilities (%) of decisions for the four treatment arms at different IAs during Part 1 for design D1.*

|            |                 | <i>Scenario G</i>      |                        |                        |                        |
|------------|-----------------|------------------------|------------------------|------------------------|------------------------|
|            | <b>Decision</b> | <b>TRT1<br/>(0.07)</b> | <b>TRT2<br/>(0.10)</b> | <b>TRT3<br/>(0.25)</b> | <b>TRT4<br/>(0.25)</b> |
| <b>IA1</b> | Expand          | 2.82                   | 7.4                    | 47.91                  | N/A                    |
|            | Terminate       | 85.04                  | 73.47                  | 24.02                  | N/A                    |
|            | Continue        | 12.14                  | 19.13                  | 28.07                  | N/A                    |
| <b>IA2</b> | Expand          | 4.1                    | 9.54                   | 25.76                  | N/A                    |
|            | Terminate       | 7.3                    | 8.21                   | 1.0                    | N/A                    |
|            | Continue        | 0.74                   | 1.38                   | 1.31                   | N/A                    |
| <b>IA3</b> | Expand          | 0.68                   | 1.28                   | 1.3                    | 47.25                  |
|            | Terminate       | 0.06                   | 0.1                    | 0.01                   | 24.13                  |
|            | Continue        | 0                      | 0                      | 0                      | 28.62                  |
| <b>IA4</b> | Expand          | N/A                    | N/A                    | N/A                    | 27.76                  |
|            | Terminate       | N/A                    | N/A                    | N/A                    | 0.86                   |
|            | Continue        | N/A                    | N/A                    | N/A                    | 0                      |

Note: Probabilities are not cumulative. TRT4 is introduced into the study after IA2.

**Scenario G: True ORRs = 0.07, 0.10, 0.25, 0.25**

*Table S5.2: Operating characteristics for the four treatment arms for design D1. **Part 1:** Decision probabilities (%); Sample size for Part 1 ( $n_1$ ) – mean (SD) [IQR]. **Part 2** (Unconditional—derived across 10,000 simulation runs, and Conditional—derived across simulation runs for which a decision to expand a treatment into Part 2 is made): Sample size for Part 2 ( $n_2$ ) – mean (SD) [IQR]; Total sample size ( $n_{tot}$ ) – mean (SD) [IQR]; Power (%) of the final analysis using pooled data from Parts 1 and 2.*

|                                                  | <b>Scenario G</b>      |                        |                        |                        |
|--------------------------------------------------|------------------------|------------------------|------------------------|------------------------|
|                                                  | <b>TRT1<br/>(0.07)</b> | <b>TRT2<br/>(0.10)</b> | <b>TRT3<br/>(0.25)</b> | <b>TRT4<br/>(0.25)</b> |
| <b>Part 1</b>                                    |                        |                        |                        |                        |
| <b>Decision probabilities (%)</b>                |                        |                        |                        |                        |
| Pr(Expand)                                       | 7.6                    | 18.22                  | 74.97                  | 75.01                  |
| Pr(Terminate)                                    | 92.4                   | 81.78                  | 25.03                  | 24.99                  |
| <b>Sample size for Part 1 (<math>n_1</math>)</b> |                        |                        |                        |                        |
| Mean (SD) [IQR]                                  | 12 (6)<br>[10-10]      | 14 (7)<br>[10-10]      | 15 (8)<br>[10-29]      | 15 (9)<br>[10-29]      |
| <b>Part 2 – Unconditional Characteristics</b>    |                        |                        |                        |                        |
| <b>Sample size for Part 2 (<math>n_2</math>)</b> |                        |                        |                        |                        |
| Mean (SD) [IQR]                                  | 5 (18)<br>[0-0]        | 12 (26)<br>[0-0]       | 37 (29)<br>[0-70]      | 36 (29)<br>[20-70]     |
| <b>Total sample size (<math>n_{tot}</math>)</b>  |                        |                        |                        |                        |
| Mean (SD) [IQR]                                  | 17 (22)<br>[10-10]     | 26 (30)<br>[10-29]     | 52 (32)<br>[29-80]     | 51 (32)<br>[30-80]     |
| Power ( $P_{1-2}$ ) (%)                          | <0.1                   | 0.8                    | 69.8                   | 69.3                   |
| <b>Part 2 – Conditional Characteristics</b>      |                        |                        |                        |                        |
| <b>Sample size for Part 2 (<math>n_2</math>)</b> |                        |                        |                        |                        |
| Mean (SD) [IQR]                                  | 68 (10)<br>[70-70]     | 66 (13)<br>[70-70]     | 50 (22)<br>[20-70]     | 48 (27)<br>[20-70]     |
| <b>Total sample size (<math>n_{tot}</math>)</b>  |                        |                        |                        |                        |
| Mean (SD) [IQR]                                  | 90 (15)<br>[80-99]     | 87 (17)<br>[80-99]     | 66 (24)<br>[45-80]     | 65 (24)<br>[45-80]     |
| Power ( $P_{1-2}$ ) (%)                          | 0.4                    | 4.4                    | 93.1                   | 92.3                   |

Note: SD = standard deviation; IQR = Interquartile Range [Q25 – Q75]



**Scenario G: True ORRs = 0.07, 0.10, 0.25, 0.25**

*Figure S.5.3: Power of the final analysis (left plot) and average total sample size (right plot) for the four treatment arms for designs D1, D2, D3, and D4*

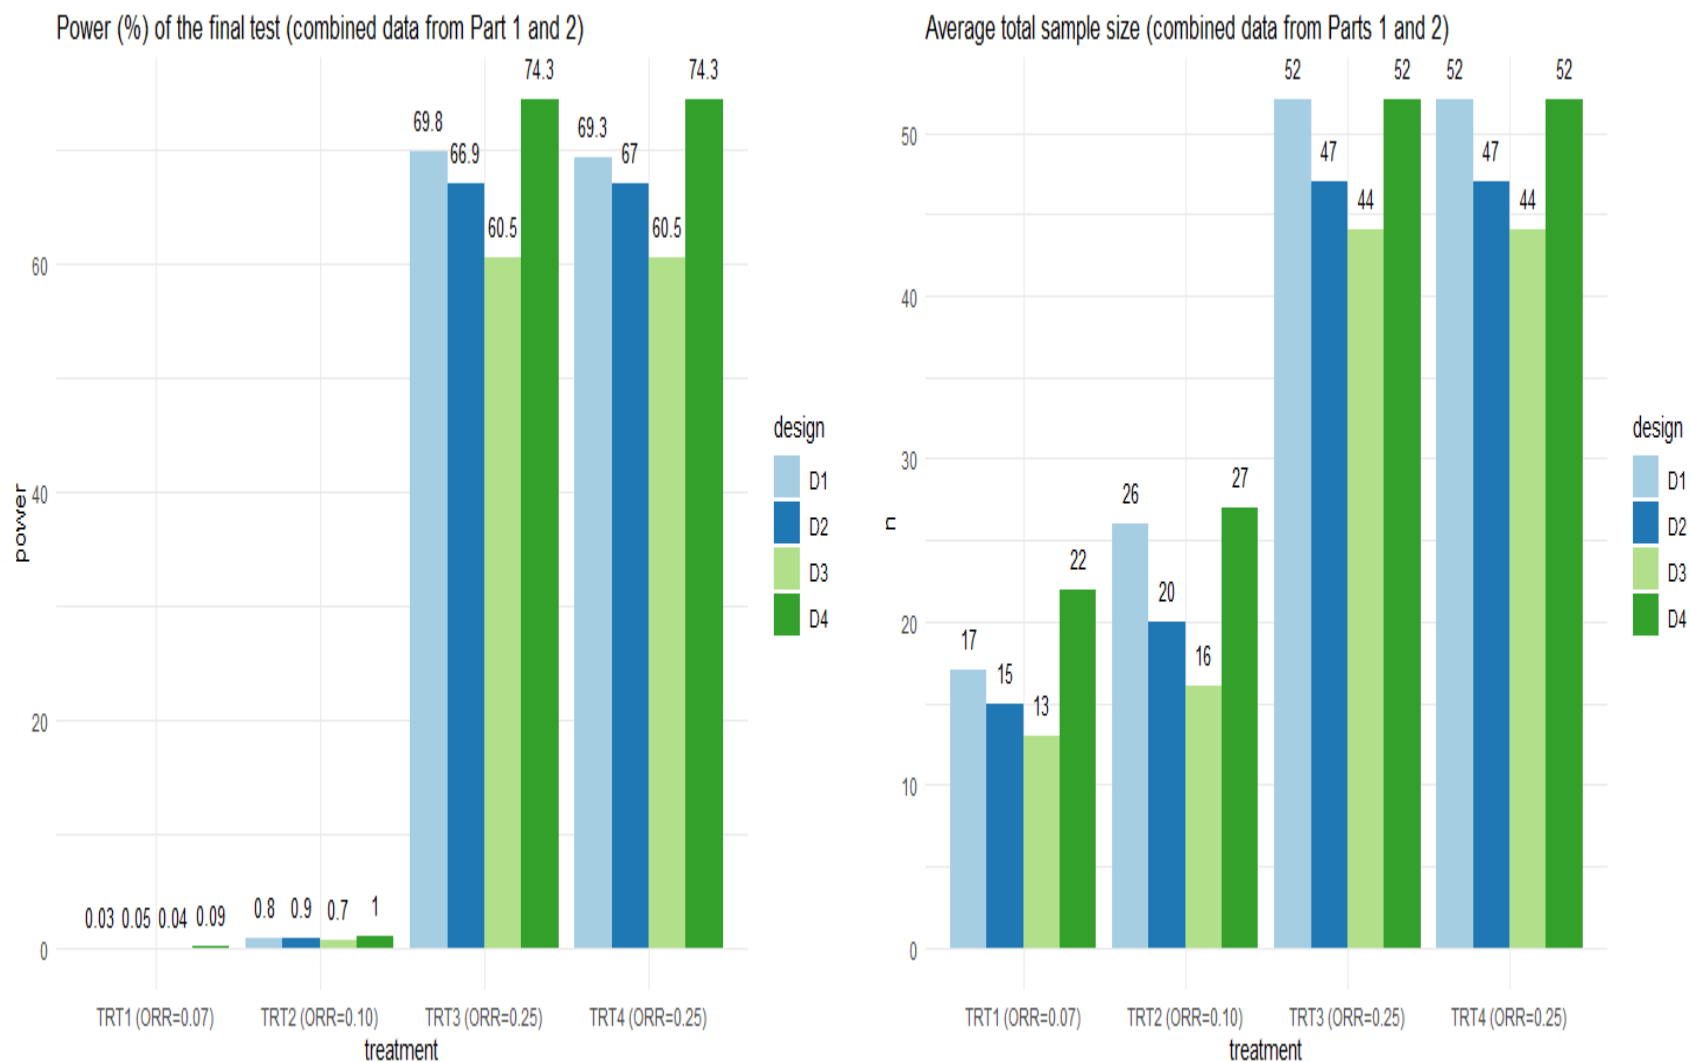

**Scenario H: True ORRs = 0.07, 0.15, 0.25, 0.25**

*Table S6.1: Probabilities (%) of decisions for the four treatment arms at different IAs during Part 1 for design D1.*

|            |                 | <i>Scenario H</i>      |                        |                        |                        |
|------------|-----------------|------------------------|------------------------|------------------------|------------------------|
|            | <b>Decision</b> | <b>TRT1<br/>(0.07)</b> | <b>TRT2<br/>(0.15)</b> | <b>TRT3<br/>(0.25)</b> | <b>TRT4<br/>(0.25)</b> |
| <b>IA1</b> | Expand          | 2.82                   | 18.65                  | 47.91                  | N/A                    |
|            | Terminate       | 85.04                  | 55.22                  | 24.02                  | N/A                    |
|            | Continue        | 12.12                  | 26.13                  | 28.07                  | N/A                    |
| <b>IA2</b> | Expand          | 3.91                   | 18.64                  | 25.29                  | N/A                    |
|            | Terminate       | 7.27                   | 5.5                    | 0.9                    | N/A                    |
|            | Continue        | 0.96                   | 1.99                   | 1.88                   | N/A                    |
| <b>IA3</b> | Expand          | 0.89                   | 1.94                   | 1.83                   | 47.25                  |
|            | Terminate       | 0.07                   | 0.04                   | 0.01                   | 24.13                  |
|            | Continue        | 0                      | 0.01                   | 0.04                   | 28.62                  |
| <b>IA4</b> | Expand          | N/A                    | 0.01                   | 0.04                   | 27.76                  |
|            | Terminate       | N/A                    | 0                      | 0                      | 0.86                   |
|            | Continue        | N/A                    | 0                      | 0                      | 0                      |

Note: Probabilities are not cumulative. TRT4 is introduced into the study after IA2.

**Scenario H: True ORRs = 0.07, 0.15, 0.25, 0.25**

*Table S6.2: Operating characteristics for the four treatment arms for design D1. **Part 1:** Decision probabilities (%); Sample size for Part 1 ( $n_1$ ) – mean (SD) [IQR]. **Part 2** (Unconditional—derived across 10,000 simulation runs, and Conditional—derived across simulation runs for which a decision to expand a treatment into Part 2 is made): Sample size for Part 2 ( $n_2$ ) – mean (SD) [IQR]; Total sample size ( $n_{tot}$ ) – mean (SD) [IQR]; Power (%) of the final analysis using pooled data from Parts 1 and 2.*

|                                                  | <b>Scenario H</b>      |                        |                        |                        |
|--------------------------------------------------|------------------------|------------------------|------------------------|------------------------|
|                                                  | <b>TRT1<br/>(0.07)</b> | <b>TRT2<br/>(0.15)</b> | <b>TRT3<br/>(0.25)</b> | <b>TRT4<br/>(0.25)</b> |
| <b>Part 1</b>                                    |                        |                        |                        |                        |
| <b>Decision probabilities (%)</b>                |                        |                        |                        |                        |
| Pr(Expand)                                       | 7.62                   | 39.24                  | 75.07                  | 74.7                   |
| Pr(Terminate)                                    | 92.38                  | 60.76                  | 24.93                  | 25.3                   |
| <b>Sample size for Part 1 (<math>n_1</math>)</b> |                        |                        |                        |                        |
| Mean (SD) [IQR]                                  | 12 (6)<br>[10-10]      | 15 (8)<br>[10-28]      | 15 (8)<br>[10-29]      | 15 (9)<br>[10-29]      |
| <b>Part 2 – Unconditional Characteristics</b>    |                        |                        |                        |                        |
| <b>Sample size for Part 2 (<math>n_2</math>)</b> |                        |                        |                        |                        |
| Mean (SD) [IQR]                                  | 5 (18)<br>[0-0]        | 24 (32)<br>[0-70]      | 37 (29)<br>[20-70]     | 35 (29)<br>[0-70]      |
| <b>Total sample size (<math>n_{tot}</math>)</b>  |                        |                        |                        |                        |
| Mean (SD) [IQR]                                  | 17 (22)<br>[10-10]     | 39 (36)<br>[10-80]     | 52 (32)<br>[30-80]     | 51 (32)<br>[29-80]     |
| Power ( $P_{1-2}$ ) (%)                          | <0.1                   | 13.2                   | 69.6                   | 68.7                   |
| <b>Part 2 – Conditional Characteristics</b>      |                        |                        |                        |                        |
| <b>Sample size for Part 2 (<math>n_2</math>)</b> |                        |                        |                        |                        |
| Mean (SD) [IQR]                                  | 67 (11)<br>[70-70]     | 60 (18)<br>[70-70]     | 49 (23)<br>[20-70]     | 47 (23)<br>[20-70]     |
| <b>Total sample size (<math>n_{tot}</math>)</b>  |                        |                        |                        |                        |
| Mean (SD) [IQR]                                  | 89 (15)<br>[80-99]     | 80 (22)<br>[80-99]     | 66 (29)<br>[45-80]     | 64 (25)<br>[45-80]     |
| Power ( $P_{1-2}$ ) (%)                          | 0.5                    | 33.6                   | 92.7                   | 91.9                   |

Note: SD = standard deviation; IQR = Interquartile Range [Q25 – Q75]

**Scenario H: True ORRs = 0.07, 0.15, 0.25, 0.25**

*Figure S.6.3: Power of the final analysis (left plot) and average total sample size (right plot) for the four treatment arms for designs D1, D2, D3, and D4*

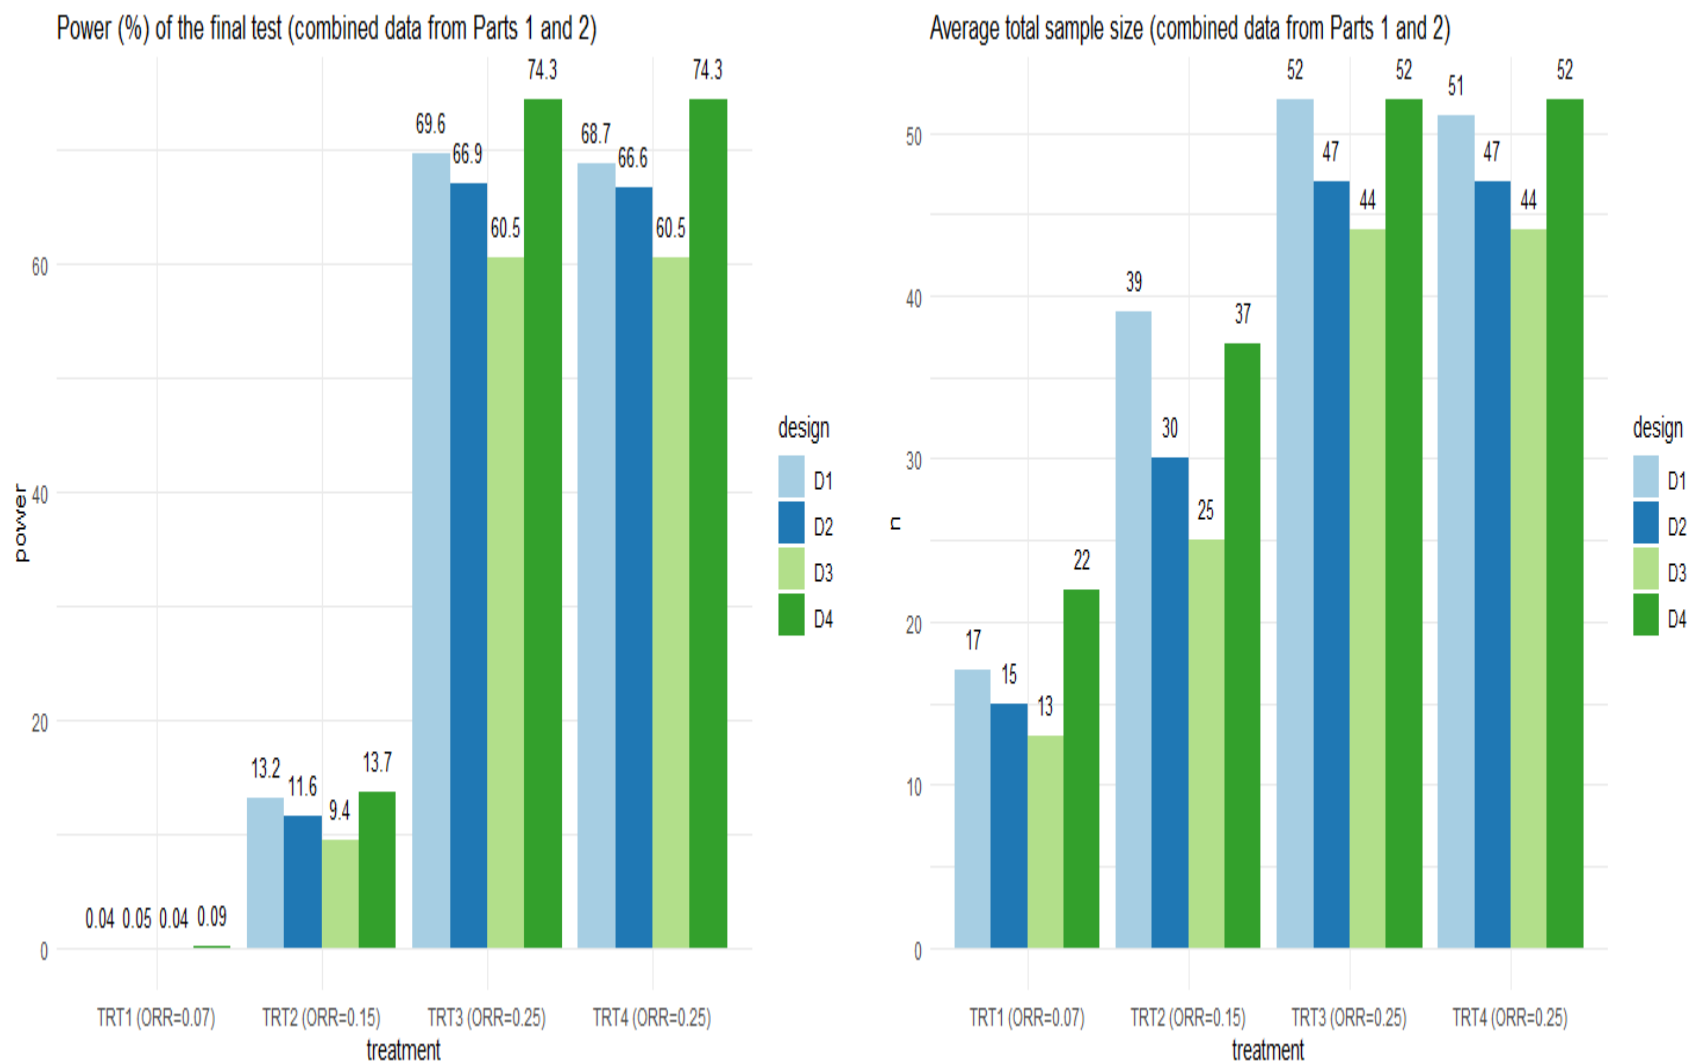

Supplement: Supplementary file 1 [file 22150800]
